# Supplementary material for: Photocatalytic Remediation of Harmful Alexandrium minutum Bloom Using Hybrid Chitosan-Modified TiO2 Films in Seawater: A Lab-Based Study
Source: MDPI journal article supplement (doi:10.3390/catal12070707), 2022-06-27
Supplement: s1 [file s1]

Supplementary Materials

# Photocatalytic Remediation of Harmful *Alexandrium Minutum* Bloom Using Hybrid Chitosan Modified TiO<sub>2</sub> Films in Seawater: A Lab-Based Study

Nur Hanisah Ibrahim <sup>1</sup>, Anwar Iqbal <sup>1,\*</sup>, Normawaty Mohammad-Noor <sup>2,\*</sup>, Roziawati Mohd Razali <sup>3</sup>, Srimala Sreekantan <sup>4</sup>, Dede Heri Yuli Yanto <sup>5,6</sup>, Abdul Hanif Mahadi <sup>7</sup> and Lee D. Wilson <sup>8,\*</sup>

<sup>1</sup> School of Chemical Sciences, Universiti Sains Malaysia, Minden, Gelugor 11800, Penang, Malaysia; anwariqbal@usm.my; nur\_hanisah95@yahoo.com

<sup>2</sup> Department of Marine Science, Kulliyyah of Science, International Islamic University Malaysia, Jalan Sultan Ahmad Shah, Bandar Indera Mahkota, Kuantan 25200, Pahang, Malaysia

<sup>3</sup> Fisheries Research Institute, Batu Maung 11960, Penang, Malaysia; roziawati80@gmail.com

<sup>4</sup> School of Material and Mineral Resources Engineering, Universiti Sains Malaysia, Nibong Tebal 14300, Penang, Malaysia; srimala@usm.my

<sup>5</sup> Research Center for Applied Microbiology, National Research and Innovation Agency (BRIN), Cibinong, Bogor 16911, Indonesia; dede.heri.yuli.yanto@brin.go.id

<sup>6</sup> Research Collaboration Center for Marine Biomaterials, Jatinangor, Indonesia.

<sup>7</sup> Centre for Advanced Material and Energy Sciences, Universiti Brunei Darussalam, Jalan Tungku Link, Gadong, Bandar Seri Begawan BE1410, Brunei; hanif.mahadi@ubd.edu.bn

<sup>8</sup> Department of Chemistry, University of Saskatchewan, 110 Science Place, Room 165 Thorvaldson Building, Saskatoon, SK S7N 5C9, Canada; lee.wilson@usask.ca

\* Correspondence: anwariqbal@usm.my (A.I.); normahwaty@iium.edu.my (N.M.-N.); lee.wilson@usask.ca (L.D.W.)

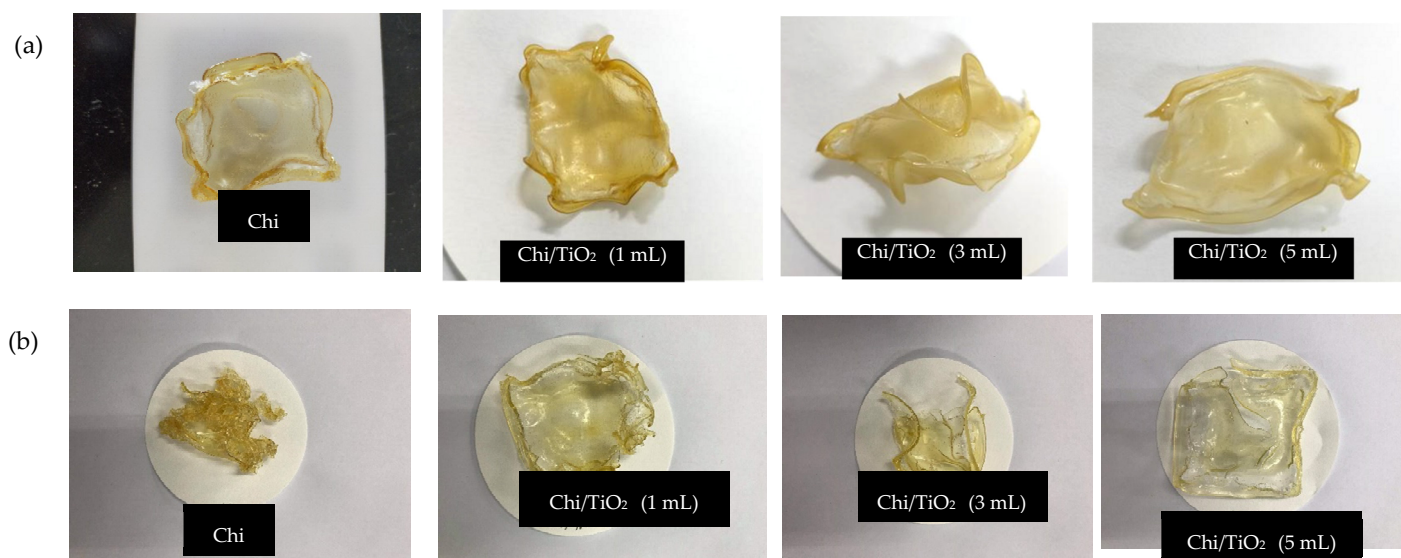

**Figure S1.** The physical appearance of the films (a) before and (b) after the mitigation process.

**Table S1.** The weight differences of the films before and after the mitigation process.

| Film                        | Before mitigation | After mitigation |
|-----------------------------|-------------------|------------------|
|                             | (g)               | (g)              |
| Chi                         | 0.79              | 0.69             |
| Chi/TiO <sub>2</sub> (1 mL) | 0.77              | 0.68             |
| Chi/TiO <sub>2</sub> (3 mL) | 0.81              | 0.69             |
| Chi/TiO <sub>2</sub> (5 mL) | 0.84              | 0.61             |
